# Supplementary material for: Aspergillosis in anorexia nervosa: a report of two cases and review of the literature
Source: Research Square preprint supplement (doi:10.21203/rs.3.rs-8657208/v1), 2026-02-19
Supplement: Supplementary file 1 [file f973c0e3512af8b3e2be13db.docx]

| **Patient/**  **reference** | **Sex, age, BMI** | **Classification**  **[14]** | **Imaging** | **Fungal biomarkers** | **Treatment** | **Evolution** |
| --- | --- | --- | --- | --- | --- | --- |
| **Case 1** | Male,  26 years  BMI: 12 kg/m2 | Initial simple  aspergilloma  Evolution to probable chronic cavitary pulmonary aspergillosis | Thoracic TDM:  Endocavitary material suggesting *Aspergillus* implantation  (**Fig. 1a**)  Preexisting lesions with previous history of *Mycobacterium szulgai* infection | β-1-3 glucan*: positive (114 pg/mL)  *Aspergillus* antibodiesǂ: positive >80 AU/ml: nine precipitin bands (chymotrypsin and catalase +)  GM§: positive BAL (index: 5.88/ negative serum)  Culture: rare colonies of multi-sensitive *A. fumigatus*  qPCR *Aspergillus*#: positive (Ct: 32.82) | Uniquely medical:  amoxicillin/clavulanic acid 1g 3/day  voriconazole (VCZ) 200 mg 2/day  cotrimoxazole 800/160 mg 2 caps 2/day | Clinical and radiological improvement with regression of cavities and major refilling of cavities on thoracic scans  Evolution favourable |
| **Case 2** | Female,  24 years  BMI: 10  kg/m2 | Simple aspergilloma | Thoracic TDM:  Aggravation of lesions with suspicion of aspergillosis in  a preexisting cavity  (Fig. 2a)  Preexisting lesion with history of *Pneumocystis jirovecii* infection | β-1-3-glucan:1 equivocal (70 pg/mL)  *Aspergillus* antibodies:2 positive >80 AU/ml: six precipitin bands (chymotrypsin and catalase +)  GM: positive serum (index: 2.91) and BAL (index: >6)  Culture: many colonies of multi-sensitive *A. fumigatus*  qPCR *Aspergillus*: positive (Ct: 30.36) | Uniquely medical:  voriconazole 100 mg 2/day  amoxicillin/clavulanic acid 500 mg 3/day | Returned home against medical advice  Imaging not performed  Death |
| Takushima *et al.*, 2004  [35] | Female,  27 years  BMI: 15 kg/m2 | Simple aspergilloma | CT scan: nodular shadows in a cavity  No history mentioned or preexisting lesion | β-1-3 glucan: negative  *Aspergillus* antibodies: ND  GM: negative (serum)  Culture (sputum): negative  PCR: ND | Uniquely surgical  Lobectomy (VATS) | Required intubation and ventilation  Evolution favourable |
| Noter *et al.*, 2009 [36] | Female,  19 years  BMI: N/A  (severe cachexia) | Simple aspergilloma | CT scan: cavity in right upper lobe  History of aspiration pneumopathy (nasogastric nutrition) | β-1-3 glucan: ND  *Aspergillus* antibodies: high anti-*Aspergillus fumigatus* IgE  GM: ND  Culture: positive for *Aspergillus* spp.  PCR: ND | Surgical and medical treatment  Thoracotomy and lobectomy of the right upper lobe  Itraconazole (route of administration not reported) (dose not mentioned)  Treatment per operative | No postoperative complication  Evolution favourable |
| Mogi *et al.*, 2012 [37] | Female,  31 years  BMI: 12.5 kg/m2 | Simple aspergilloma | Thoracic radiography: infiltrating shadow with apical pleural thickening in the left upper pulmonary lobe  CT scan: irregular mass shadow with cavity formation involving spherical masses in the left upper lobe  No history mentioned or preexisting lesion | β-1-3 glucan: ND  *Aspergillus* antibodies: positive  GM: negative (serum)  Culture: ND  PCR: ND | Uniquely surgical  Segmentectomy of the left apical segment (S1+2) | No complication  7 months later: more anomalies on thoracic radiology  Evolution favourable |
| Enriquez-Estrada *et al.*, 2019 [39] | Female,  23 years  BMI: 13 kg/m2 | Simple aspergilloma | CT scan: left sub-segment atelectasis, multiple cavities predominantly apical  History of community acquired pneumonia with sequalae of pulmonary fibrosis and oxygen requirement (2–3 L/min)  Probable pulmonary tuberculosis diagnosed and treated | β-1-3 glucan: ND  *Aspergillus* antibodies: ND  GM: positive (BAL)  Culture positive for *A. fumigatus*  PCR: ND | Uniquely medical  Voriconazole (route of administration not specified)  (dose not mentioned) | Slow evolution  Evolution favourable |
| Shimoni *et al*., 2006 [40] | Female,  29 years  BMI: N/A  (extremely cachectic) | Invasive pulmonary aspergillosis  🡪 SAIA (subacute invasive aspergillosis) | Radiothoracic CT scan showed multiples cavities in the left upper lobe  No history mentioned or preexisting lesion | β-1-3 glucan: ND  *Aspergillus* antibodies: ND  GM: ND  Culture positive for *A. niger*  PCR: ND | Uniquely medical  Ceftriaxone 1 g/day + amphotericin B  (Sputum positive for *Klebsiella* spp.) | Intubation and mechanical ventilation  Death (cardiovascular collapse) |
| Pejčić *et al.*, 2012 [38] | Female, 44 years  BMI: 12.3 kg/m2 | Chronic necrotising pulmonary aspergillosis | Radiography scan: shadows with illumination in both apexes. Proeminent in the right one  CT scan: cavernous changes in the thick wall that filled both apexes | β-1-3 glucan: ND  *Aspergillus* antibodies:  IgG : 79 AU/ml (positive >70 AU/ml)  IgM : 91 AU/ml (positive >70)  IgE : normal (97 IU/l)  GM: not available  Culture ND  PCR: ND  Histopathology: *Aspergillus* hyphae | Uniquely medical  Liposomal amphotericin B (20 days) then oral voriconazole (200+100mg during 50 days) | Evolution favourable |
| Shirahata *et al.*, 2021 [41] | Female,  37 years  BMI: 11.1 kg/m2 | Chronic necrotising pulmonary aspergillosis | Radiography and thoracic CT scans: shadow in the upper right pulmonary lobe  Radiology showed an exacerbation of infiltration of the shadow and discovered a new fungal mass in the preexisting cavity with a thickening of this cavity  No history or preexisting lesion mentioned | β-1-3 glucan: negative  *Aspergillus* antibodies: positive  GM: negative (serum)  Culture positive for *A. fumigatus*  PCR: ND | Surgical and medical treatment  VATS right upper lobectomy and right S6 segmentectomy  Oral voriconazole 250 mg/day then 300 mg/day (because sub-dose)  250 mg/day for 18 months then increased to 300 mg/day (after dosage at 2 µg/mL)  Per operative treatment | Postoperative unremarkable  Evolution favourable |
| Vidmar *et al.*, 2025 [21] | Female, 44 years  BMI: 11.1 kg/m2 | Chronic pulmonary aspergillosis (CPA)  Coinfection *Mycobacterium celatum* | Thoracic CT scan: bilateral cavitary lesions with polypoid growth at the right upper lobe. Nodules mostly present at the left upper lobe and lingula | β-1-3 glucan: ND  *Aspergillus* antibodies: ND  GM: ND  Culture (BAL): presence of *A.fumigatus*  Sputum culture : panazole restistant strain Aspergillus  PCR: ND | Uniquely medical  Voriconazole  Switch with micafungin due to panazole-resistant *Aspergillus* strain  Treatment for nontuberculous mycobacteria (NTM) | No improvement during several months then readmitted to treat CPA then to treat NTM  Evolution favourable |

*: Fungitell®; positive >80 pg/mL; ǂ: Elisa Platelia® Aspergillus IgG, Bio-Rad; positive >10 IU; §: Elisa Platelia®Aspergillus Ag, Bio-Rad, cut-off 0.5; #: mitochondrial gene coding for transfer RNA.

VATS: video-assisted thoracic surgery; GM: galactomannan; BAL: bronchoalveolar lavage; PCR: polymerase chain reaction; CT: computed tomography; TDM: tomodensitometry; ND: not done; N/A: not available;
